# ***Rpi-amr3* confers resistance to multiple *Phytophthora* species by recognizing a conserved RXLR effector**

Xiao Lin<sup>1</sup>, Andrea Olave-Achury<sup>1</sup>, Robert Heal<sup>1</sup>, Kamil Witek<sup>1</sup>, Hari S. Karki<sup>1#</sup>, Tianqiao Song<sup>1#</sup>, Chih-hang Wu<sup>1#</sup>, Hiroaki Adachi<sup>1#</sup>, Sophien Kamoun<sup>1</sup>, Vivianne G. A. A. Vleeshouwers<sup>2</sup> and Jonathan D. G. Jones<sup>1\*</sup>

<sup>1</sup>The Sainsbury Laboratory, University of East Anglia, Norwich Research Park, Norwich, NR4 7UH, UK

<sup>2</sup>Wageningen UR Plant Breeding, Wageningen University and Research, Droevendaalsesteeg 1, 6708 PB, Wageningen, The Netherlands

#Current addresses:

HSK: U.S. Department of Agriculture–Agricultural Research Service, Madison, WI 53706, U.S.A

TS: Institute of Plant Protection, Jiangsu Academy of Agricultural Sciences, Nanjing, 210014, P. R. China

CHW: Institute of Plant and Microbial Biology, Academia Sinica, Taiwan

HA: Nara Institute of Science and Technology, Ikoma 630-0192, Japan

\*Corresponding author: Jonathan D. G. Jones ([jonathan.jones@tsl.ac.uk](mailto:jonathan.jones@tsl.ac.uk))

## Abstract

Diverse pathogens from the genus *Phytophthora* cause disease and reduce yields in many crop plants. Although many *Resistance to Phytophthora infestans* (*Rpi*) genes effective against potato late blight have been cloned, few have been cloned against other *Phytophthora* species. Most *Rpi* genes encode nucleotide-binding domain, leucine-rich repeat- containing (NLR) proteins, that recognize RXLR effectors. However, whether NLR proteins can recognize RXLR effectors from multiple different *Phytophthora* pathogens has rarely been investigated. Here, we report the effector AVRamr3 from *P. infestans* that is recognized by Rpi-amr3 from *S. americanum*. We show here that AVRamr3 is broadly conserved in many different *Phytophthora* species, and that recognition of AVRamr3 homologs enables resistance against multiple *Phytophthora* pathogens, including *P. parasitica* and *P. palmivora*. Our findings suggest a novel path to identifying *R* genes against important plant pathogens.

## 1 Introduction

2

3 Species in the oomycete genus *Phytophthora* cause many devastating plant diseases. For  
4 example, *P. infestans*, *P. parasitica*, *P. cactorum*, *P. ramorum*, *P. sojae*, *P. palmivora* and *P.*  
5 *megakarya* cause disease on potato and tomato, tobacco, strawberry, oak, soybean and cacao,  
6 respectively (Kamoun et al., 2015).

7

8 Plant immunity involves detection of pathogen-derived molecules by either cell-surface pattern  
9 recognition immune receptors (PRRs) or intracellular nucleotide-binding domain, leucine-rich  
10 repeat containing (NLR) immune receptors, that activate either pattern-triggered immunity  
11 (PTI) or effector-triggered immunity (ETI), respectively (Jones and Dangl, 2006). So far, many  
12 *Resistance to P. infestans (Rpi)* genes were cloned from wild *Solanum* species which confer  
13 resistance against potato late blight (Vleeshouwers et al., 2011). Many *R* genes against *P. sojae*  
14 (*Rps*) have also been mapped in different soybean accessions, and some were cloned (Sahoo et  
15 al., 2017). In tobacco, the black shank resistance genes *Phl*, *Php* and *Ph* were genetically  
16 mapped but not yet cloned; these confer race-specific resistance to *P. parasitica* (aka *P.*  
17 *nicotianae*) isolates (Gallup and Shew, 2010; Bao et al., 2019). For *P. palmivora*, some  
18 resistant cacao (*Theobroma cacao*) accessions were identified, but no dominant *R* genes have  
19 been defined or cloned (Thevenin et al., 2012). In summary, very few *R* genes against other  
20 *Phytophthora* pathogens have been cloned.

21

22 *Solanum americanum* and *S. nigrum* are highly resistant to *P. infestans* (Witek et al., 2016;  
23 Witek et al., 2021). Two *Rpi* genes of coiled-coil (CC) type, *Rpi-amr3* and *Rpi-amr1*, were  
24 cloned from different *S. americanum* accessions, and both confer broad-spectrum late blight  
25 resistance in cultivated potatoes (Witek et al., 2016; Witek et al., 2021).

26

27 In oomycetes, *Rpi* proteins typically recognize RXLR (Arg-X-Leu-Arg, X represents any  
28 amino acid)-EER (Glu-Glu-Arg) effectors that are secreted into plant cells (Rehmany et al.,  
29 2005; Wang et al., 2019). Many *Avirulence (Avr)* genes encoding recognized effectors from  
30 *Phytophthora* species have been identified and they are often fast-evolving and lineage-specific  
31 molecules (Jiang et al., 2008). Recently, AVR<sub>amr1</sub> (PITG\_07569), the recognized effector of  
32 *Rpi-amr1* was identified by a long read and cDNA pathogen enrichment sequencing (PenSeq)  
33 approach (Lin et al., 2020a). Surprisingly, AVR<sub>amr1</sub> homologs were identified from *P.*

34 *parasitica* and *P. cactorum* genomes and both are recognized by all Rpi-amr1 variants (Witek  
35 et al., 2021). Similarly, AVR3a-like effectors were found in different *Phytophthora* species,  
36 including *P. capsici* and *P. sojae*, and the recognition of AVR3a homologs correlates with *P.*  
37 *capsici* or *P. sojae* resistance in *Nicotiana* species and soybean (Shan et al., 2004; Vega-  
38 Arreguín et al., 2014), also AVRblb2 homologs from *P. andina* and *P. mirabilis* trigger HR  
39 with Rpi-blb (Oliva et al., 2015). Remarkably, a single N336Y mutation in R3a expands its  
40 recognition specificity to *P. capsici* AVR3a homolog (Segretin et al., 2014). These reports raise  
41 intriguing questions. Could RXLR effectors be widely conserved molecules among different  
42 *Phytophthora* species? Could these effectors be recognized by the same plant receptor? Of  
43 particular interest, could this effector recognition capacity enable disease resistance?

44

45 Here we identified AVRamr3, a novel AVR protein from *P. infestans*, by screening an RXLR  
46 effector library. AVRamr3 is a broadly conserved effector found in many different  
47 *Phytophthora* species. Strikingly, the recognition of AVRamr3 not only enables resistance to  
48 *P. infestans*, but also to other economically important *Phytophthora* pathogens including *P.*  
49 *parasitica* and *P. palmivora*. We also show functional *Rpi-amr3* genes are widely distributed  
50 among *S. americanum* and *S. nigrum* accessions, together with the previously defined *Rpi-*  
51 *amr1* genes, they might underpin the “non-host” resistance of these species against *P. infestans*.

52

53

## 54 **Results:**

55

### 56 ***Avramr3* encodes a conserved RXLR-WY effector protein**

57

58 To identify the effector recognized by Rpi-amr3, we screened an RXLR effector library  
59 (Rietman, 2011; Lin *et al.*, 2020) by *Agrobacterium tumefaciens*-mediated co-expression with  
60 Rpi-amr3 in *Nicotiana benthamiana*. By screening ~150 RXLR effectors, we found  
61 PITG\_21190 specifically induces hypersensitive response (HR) with *Rpi-amr3* (Fig. 1a), and  
62 concluded PITG\_21190 is *Avramr3*. *Avramr3* encodes a 339-aa protein with a signal peptide  
63 followed by RXLR, EER motifs and four predicted WY motifs (Win *et al.*, 2012) (Fig. 1b). In  
64 *P. infestans* T30-4, the expression of *Avramr3* is low during infection, however *Avramr3*  
65 upregulated in 3928A and US23 in 2-3 days after infection (Cooke *et al.*, 2012; Lin *et al.*,  
66 2020a).

67

68 Many RXLR effectors are fast-evolving, multiple-member family proteins with extensive  
69 sequence polymorphism, such as the *Avr2* and *Avrblb2* families (Gilroy *et al.*, 2011; Oliva *et*  
70 *al.*, 2015). To study the sequence polymorphism of *Avramr3*, seventeen additional *Avramr3*  
71 homologs from eleven isolates were identified from published databases (KR\_1, 3928A, EC1,  
72 6\_A1 and US23) (Lee *et al.*, 2020; Lin *et al.*, 2020a) or cloned by PCR (EC1, Katshaar, Pi14538,  
73 Pi88069, Pi99183 and Pi99177) (Fig. S1). The sequence alignment shows *Avramr3* is a highly  
74 conserved RXLR effector among *P. infestans* isolates (Fig. S1).

75

76 To find the domain responsible for recognition by Rpi-amr3, ten truncated *Avramr3* fragments  
77 were cloned (T1 to T10, Fig. 1b, Fig S2) in an expression vector, and transiently co-expressed  
78 with *Rpi-amr3* in *N. benthamiana*. We found four AVRamr3 truncations (T3, T4, T8 and T10)  
79 can be recognized by Rpi-amr3. T10 (111-240 aa) which carries the 2<sup>nd</sup> and 3<sup>rd</sup> WY motifs is  
80 the minimal region to be recognized by Rpi-amr3 but not the adjacent T9 protein (130-258 aa)  
81 (Fig. 1b and 1c). This suggests these 130 amino-acids of AVRamr3 T10 are sufficient for  
82 recognition by Rpi-amr3 and initiation of HR.

83

84

85

86

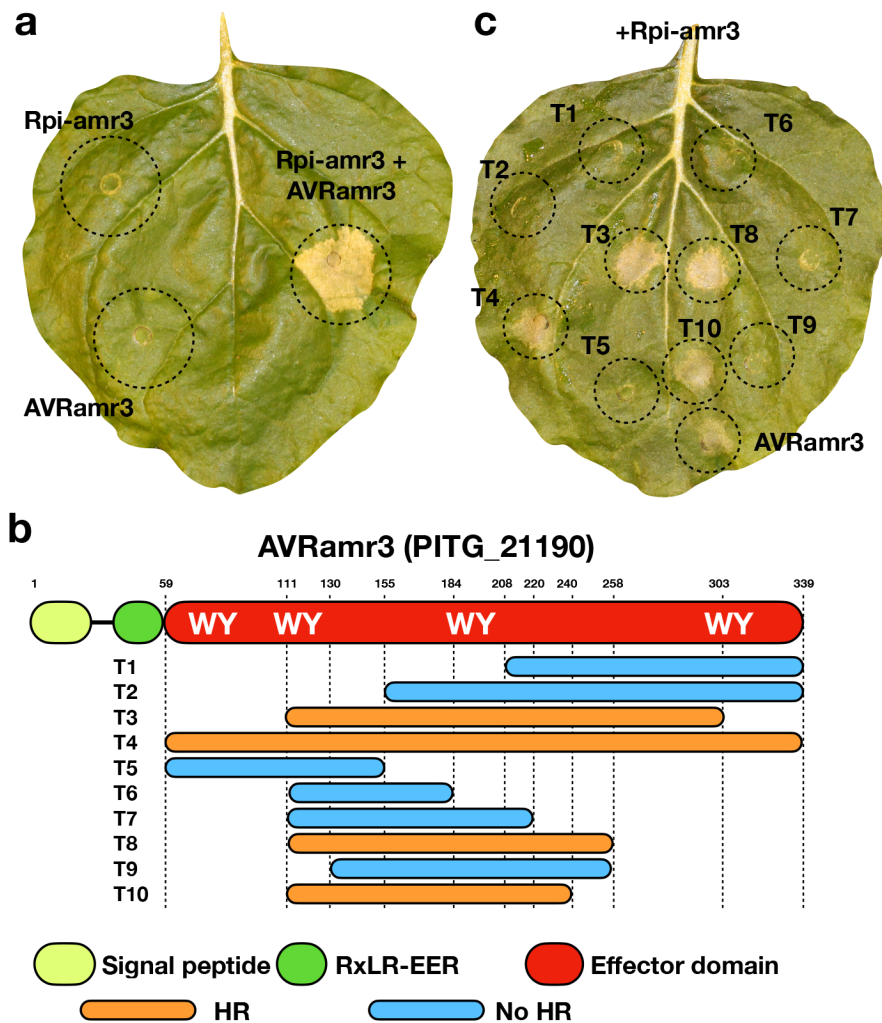

87

88 **Figure 1. AVRamr3 is the recognized effector for Rpi-amr3.**

89 (a). Co-expression of Rpi-amr3::GFP and AVRamr3::HIS-FLAG trigger cell death on *N. benthamiana*, but  
 90 expression of Rpi-amr3::GFP or AVRarm3::HIS-FLAG individually do not induce cell death. The photo was  
 91 taken 3 days after infiltration, *Agrobacterium* strain GV3101(pMP90) carrying Rpi-amr3::GFP or AVRamr3::HIS-  
 92 FLAG constructs were used in this experiment. OD<sub>600</sub>=0.5. Three biological replicates were performed with same  
 93 results. (b). Cartoon of AVRamr3 (PITG\_21190), a protein with 339 amino acids with a signal peptide (lemon),  
 94 RXLR-EER motif (green), and an effector domain (red) with four predicted WY motifs (Details are shown in Fig.  
 95 S4). T1-T10 indicate the AVRamr3 truncations used in HR assays. Those that induce HR after co-expression with  
 96 Rpi-amr3 are marked by orange bars, otherwise by blue. (c). Co-expression of Rpi-amr3::GFP and AVRamr3  
 97 truncations, all truncations are tagged with C-terminal HIS-FLAG tag. T3, T4, T8 and T10 trigger cell death when  
 98 co-expressed with Rpi-amr3, but not T1, T2, T5, T6, T7 and T9. Full-length AVRamr3::HIS-FLAG was used as  
 99 control. OD<sub>600</sub>=0.5. Three biological replicates were performed with same results.

100

101

102

103

#### 104 **Rpi-amr3 is dependent on the helper NLRs NRC2, NRC3 and NRC4**

105

106 In Solanaceae, the functionality of many CC-NLR proteins requires helper NLR proteins of the  
107 NRC class (Wu et al., 2017). To test if *Rpi-amr3* is NRC-dependent, we co-expressed *Rpi-*  
108 *amr3* and *Avramr3* in NRC knockout *N. benthamiana* lines (*nrc2/3\_1.3.1*, *nrc4\_185.9.1.3*,  
109 *nrc2/3/4\_210.4.3*)(Adachi et al., 2019; Wu et al., 2020; Witek et al., 2021). As with wild type  
110 *N. benthamiana*, we found HR on the *nrc2/3\_1.3.1* and *nrc4\_185.9.1.3* knockout lines, but not  
111 the *nrc2/3/4\_210.4.3* knockout line. Similarly, only *nrc2/3/4\_210.4.3* knockout lines show  
112 susceptibility to *P. infestans* after *Rpi-amr3* transient expression (Fig. S3). Therefore, these  
113 data suggest both *Rpi-amr3*-mediated effector recognition and resistance require NRC2, NRC3  
114 or NRC4.

115

#### 116 **Rpi-amr3 associates with AVRamr3 in planta**

117

118 To date, most Rpi proteins recognize their cognate effectors in an indirect manner, except RB  
119 and IPI-O effectors (Chen et al., 2012; Kourelis and van der Hoorn, 2018). To test the  
120 interaction between *Rpi-amr3* and *AVRamr3*, *Rpi-amr3::HA* and *AVRamr3::HIS-FLAG*  
121 epitope-tagged constructs were generated and transiently co-expressed in *nrc2/3/4* knockout *N.*  
122 *benthamiana* leaves to avoid cell death. Protein was then extracted and bi-directional co-  
123 immunoprecipitation (Co-IP) was performed. These co-IPs indicate that *Rpi-amr3* associates  
124 with *AVRamr3* bidirectionally (Fig. 2a). We also tested their interaction using a split-luciferase  
125 assay. *Rpi-amr3::Cluc* and *AVRamr3::Nluc* constructs were transiently expressed in the  
126 *nrc2/3/4* knockout *N. benthamiana*. Luciferase signal was only detected when *Rpi-amr3::Cluc*  
127 and *AVRamr3::Nluc* were co-expressed. It suggests *Rpi-amr3* physically associates with  
128 *AVRamr3 in-planta* (Fig. 2b), but not in negative controls. Our data therefore are consistent  
129 with direct interaction of *Rpi-amr3* and *AVRamr3* proteins, though do not exclude the possible  
130 involvement of additional proteins.

131

132

133

134

135

136

137

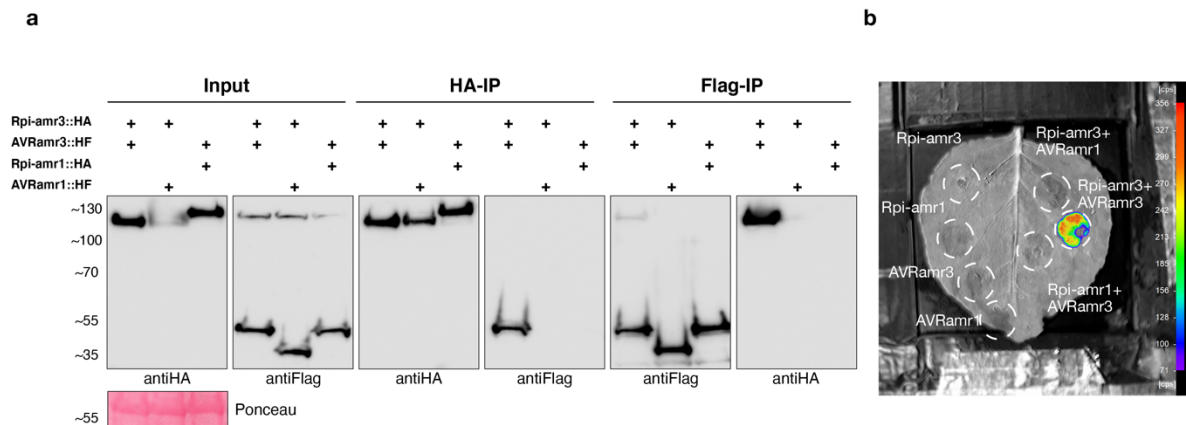

138

## 139 **Figure 2. Rpi-amr3 directly interacts with AVRamr3.**

140 **(a).** Rpi-amr3::HA and AVRamr3::HIS-FLAG constructs were used for bidirectional co-immunoprecipitation  
 141 experiment, with Rpi-amr1-HA and AVRamr1::HIS-FLAG used as control. After HA pull down of Rpi-amr3::HA  
 142 or Rpi-amr1::HA, only AVRamr3::HIS-FLAG is associated with Rpi-amr3::HA. After Flag pull down of  
 143 AVRamr3::HIS-FLAG or AVRamr1-HIS-FLAG, only Rpi-amr3::HA is associated with AVRamr3::HIS-FLAG.  
 144 *Agrobacterium* strain GV3101(pMP90) carrying different constructs were used for transiently expression in  
 145 nrc2/3/4 knockout *Nicotiana benthamiana* line (210.4.3) to abolish the cell death phenotype. OD<sub>600</sub>=0.5. Three  
 146 biological replicates were performed with same results. **(b).** Rpi-amr3::Cluc and AVRamr3::Nluc constructs were  
 147 used to test their interaction *in planta*, Rpi-amr1::Cluc and AVRamr1::Nluc were used as controls. The luciferase  
 148 signal can only be detected upon Rpi-amr3::Cluc and AVRamr3::Nluc co-expression.

149

## 150 ***Avramr3* orthologs occur in multiple *Phytophthora* species**

151

152 To study the evolution of *Avramr3* in *Phytophthora* species, we searched for *Avramr3*  
 153 homologs from published *Phytophthora* and *Hyaloperonospora arabidopsidis* (Hpa) genomes.  
 154 Surprisingly, we found *Avramr3* homologs in many *Phytophthora* genomes, including *P.*  
 155 *parasitica*, *P. cactorum*, *P. palmivora*, *P. pluvialis*, *P. megakarya*, *P. lichii*, *P. ramorum*, *P.*  
 156 *lateralis*, *P. sojae*, *P. capsici*, *P. cinnamomi*, and in *H. arabidopsidis*. Most of the *Avramr3*  
 157 homologs are located at a syntenic locus (Fig. 3a). Notably, the *P. infestans Avramr3*-  
 158 containing contig was not fully assembled; sequences are missing on the 5' side of *Avramr3*  
 159 (Fig. 3a). The protein alignment of the thirteen AVRamr3 homologs is shown in Fig S4.

160



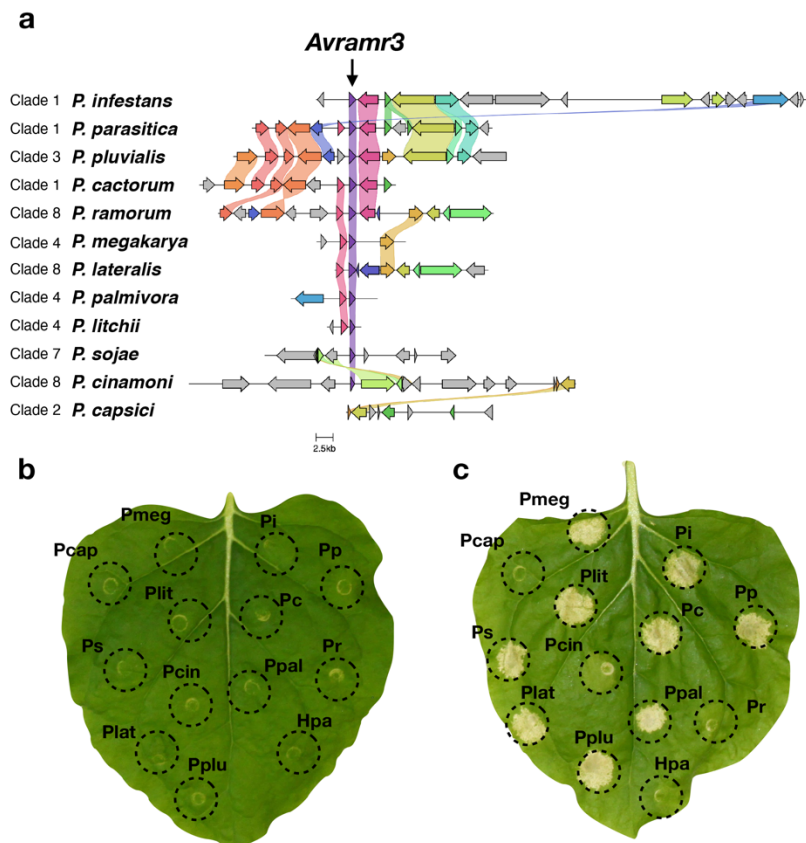

161

162 **Figure 3. AVRamr3 is a conserved effector among different *Phytophthora* species.**

163 (a). The synteny map of *Avramr3* loci from twelve different *Phytophthora* genomes. The *Avramr3* loci were  
 164 extracted from different genomes, annotated by the gene prediction tool in EumicrobeDB, then analyzed and  
 165 visualized by Clinker. *Avramr3* homologs are shown by purple triangles and indicated by a black arrow, the  
 166 flanking genes with homology are represented by the corresponding colours. The *Phytophthora* clades are adapted  
 167 from *Phytophthora* database (Rahman et al., 2014). (b). Expression of AVRamr3 homologs with HIS-FLAG tag  
 168 alone does not trigger cell death on *Nicotiana benthamiana*. *Agrobacterium* strain GV3101(pMP90) carrying  
 169 different constructs were used in this experiment. OD<sub>600</sub>=0.5. Three biological replicates were performed with  
 170 same results.

171 (c). Co-expression of AVRamr3 homologs with Rpi-amr3::GFP in *N. benthamiana*. The AVRamr3 homologs  
 172 from *Phytophthora infestans* (Pi), *P. parasitica* (Pp), *P. cactorum* (Pc), *P. palmivora* (Ppal), *P. megakarya* (Pmeg),  
 173 *P. litchii* (Plit), *P. sojae* (Ps), *P. lateralis* (Plat) and *P. pluvialis* (Pplu) induce cell death after co-expression with  
 174 Rpi-amr3::GFP, but not AVRamr3 homologs from *P. ramorum* (Pr), *P. capsici* (Pcap) and *Hyaloperonospora*  
 175 *arabidopsidis* (Hpa). The AVRamr3 homolog from *P. cinnamomi* (Pcin) shows an intermediate cell death.  
 176 *Agrobacterium* strain GV3101(pMP90) carrying different constructs were used in this experiment. OD<sub>600</sub>=0.5.  
 177 Three biological replicates were performed with same results.

178

179 To test if those AVRamr3 homologs from different *Phytophthora* species are also recognized  
 180 by Rpi-amr3, we synthesized and cloned them into an expression vector with the 35S promoter,  
 181 and performed transient expression assays in *N. benthamiana*. Expressing the effectors alone

182 does not trigger HR in *N. benthamiana* (Fig. 3b), but AVRamr3 homologs from *P. parasitica*,  
183 *P. cactorum*, *P. palmivora*, *P. megakarya*, *P. lichii*, *P. sojae*, *P. lateralis* and *P. pluvialis* can  
184 induce HR when co-expressed with Rpi-amr3. The AVRamr3 homolog from *P. cinnamomi*  
185 triggers an intermediate HR, and the AVRamr3 homologs from *P. ramorum*, *P. capsici*, and *H.*  
186 *arabidopsidis* (Fig 3c) do not trigger Rpi-amr3-dependent HR.

187

188 To test if particularly conserved amino-acids of AVRamr3 are responsible for the Rpi-amr3  
189 recognition, we mutated eight conserved amino-acid on the AVRamr3 T10 region (Figure S4).  
190 However, all tested mutants are still recognized by *Rpi-amr3* (Figure S5). This result indicates  
191 the recognition specificity might not be determined by any single amino acid on AVRamr3,  
192 but rather by its overall structure.

193

194 To test if other recognized AVRamr3 homologs also directly interact with Rpi-amr3, we  
195 performed co-immunoprecipitation and split-luciferase assays in *nrc2/3/4\_210.4.3* knockout  
196 lines. We found all the recognized AVRamr3 homologs associate with Rpi-amr3 by co-  
197 immunoprecipitation, though with varied affinity. Two unrecognized AVRamr3 homologs  
198 from *P. capsici* and *H. arabidopsidis* do not associate with Rpi-amr3. However, two  
199 unrecognized or weakly recognized AVRamr3 homologs from *P. ramorum* and *P. cinnamomi*  
200 also associate with Rpi-amr3, and the unrecognized AVRamr3-T9 truncation shows a weak  
201 association (Figure S6). In contrast, the output of split-luciferase assay is fully consistent with  
202 the HR assay (Figure S7). Our data indicating that an *in-planta* receptor-ligand interaction is  
203 necessary but might not be sufficient for the activation of Rpi-amr3 and triggering of HR.

204

205 ***Rpi-amr3* confers resistance to multiple *P. parasitica* and *P. palmivora* strains in *N.***  
206 ***benthamiana***

207

208 *Rpi-amr3* was previously reported to confer resistance against potato late blight caused by *P.*  
209 *infestans* (Witek et al., 2016). Its broad effector recognition capacity suggested *Rpi-amr3* might  
210 confer resistance against additional *Phytophthora* pathogens.

211

212 To test this hypothesis, we generated *Rpi-amr3* stable transformed *N. benthamiana* lines. Two  
213 homozygous T2 lines #13.3 and #16.5 were verified to confer *P. infestans* resistance and  
214 evaluated for *P. parasitica* and *P. palmivora* resistance. Both these pathogens have a wide host  
215 range, including the model plant *N. benthamiana*.

216

217 Six *P. parasitica* isolates (R0, R1, 310, 666, 329 and 721) were tested on *N. benthamiana*  
 218 carrying *Rpi-amr3*, and on wild type *N. benthamiana* plants as negative control. A suspension  
 219 of zoospores was used for root inoculation (Material and Methods). We found both *N.*  
 220 *benthamiana* – *Rpi-amr3* lines resist three *P. parasitica* isolates R1, 666 and 721, but are  
 221 susceptible to R0, 310 and 329 (Fig 4). In summary, *Rpi-amr3* confers resistance against three  
 222 out of six tested *P. parasitica* isolates in *N. benthamiana*.

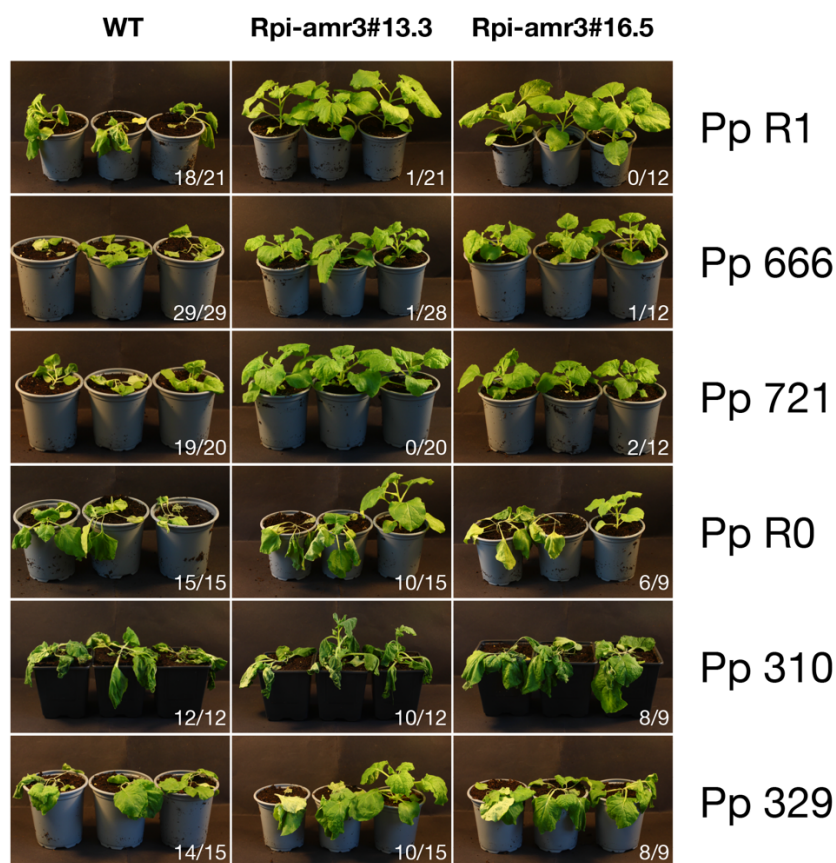

223

224 **Figure 4. Root inoculation of six *Phytophthora parasitica* isolates on *Rpi-amr3* transgenic**  
 225 ***Nicotiana benthamiana* lines.**

226 Representative photos for the *P. parasitica* root inoculation tests are shown. Two homozygous *N. benthamiana* -  
 227 *Rpi-amr3* lines #13.3 and #16.5 were used in this experiment. Wild type *N. benthamiana* plants were used as  
 228 control. Six *P. parasitica* isolates were used for root inoculation, *Rpi-amr3* confers resistance against R1, 666 and  
 229 721, but not R0, 310 and 329. 3-4 weeks *N. benthamiana* were used for the root inoculation, 3 plants/line were  
 230 used for each experiment and as least three biological replicates were performed with similar results The numbers  
 231 indicate susceptible plants/total tested plants.

232

233 The *PpAvramr3* homologs from the six *P. parasitica* isolates were PCR amplified, sub-cloned  
 234 and sequenced. *PpAvramr3* homologs were identified from R0, R1 and 310, 666 and 721, but

235 not from 329 (Fig S8). These data suggest the presence of recognized AVR $amr3$  homologs  
 236 from the *Phytophthora* pathogens is necessary but not sufficient to induce Rpi- $amr3$  mediated  
 237 resistance.

238  
 239 Furthermore, we tested another broad host range *Phytophthora* pathogen, *P. palmivora*, which  
 240 causes major losses on many tropical tree crops like papaya, mango, cacao, coconut and palm  
 241 tree. We tested seven *P. palmivora* isolates on the two Rpi- $amr3$  transgenic *N. benthamiana*  
 242 lines by root inoculation, and wild type *N. benthamiana* was used as a control. We found Rpi-  
 243  $amr3$  confers resistance to three out of seven tested *P. palmivora* isolates, including 7551, 7547,  
 244 7545, but not to 3914, 7548. For two other isolates 0113 and 3738, inconsistent results were  
 245 obtained from the two Rpi- $amr3$  transgenic lines (Fig 5). To verify the presence of *Avramr3*  
 246 homologs in these tested *P. palmivora* isolates, we PCR amplified the *Avramr3* homologs from  
 247 genomic DNA of the seven *P. palmivora* isolates. All the tested *P. palmivora* carry  
 248 *PpalAvramr3* variants (Figure S9). Taken together, Rpi- $amr3$  confers resistance to at least 3/7  
 249 tested *P. palmivora* isolates in the root inoculation assay.

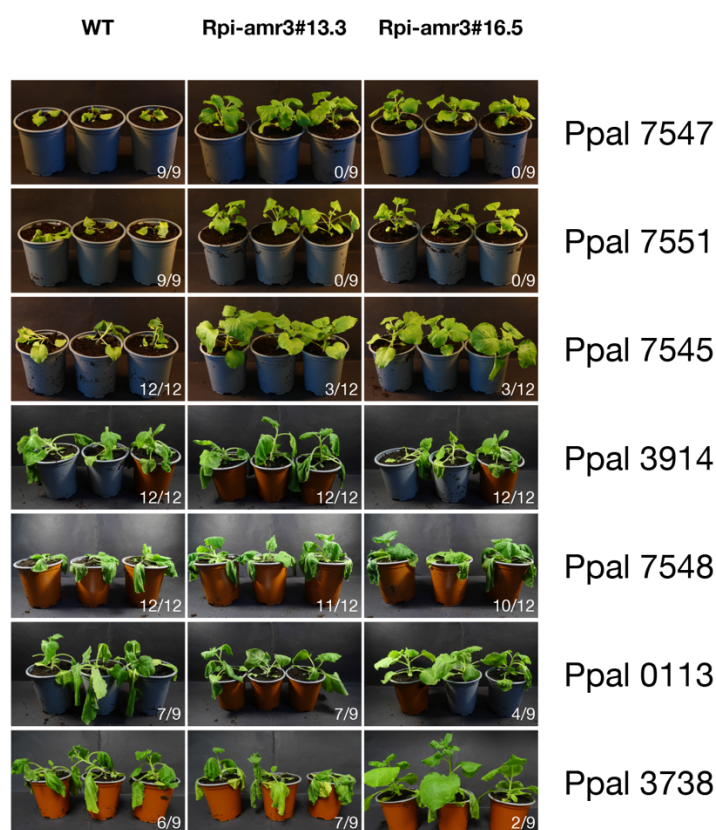

250  
 251 **Figure 5. Root inoculation of 7 *Phytophthora palmivora* isolates on Rpi- $amr3$  transgenic**  
 252 ***Nicotiana benthamiana* lines.**

253 Two homozygous *N. benthamiana* - *Rpi-amr3* lines #13.3 and #16.5 were used in this experiment, wild type *N.*  
254 *benthamiana* were used as control. Seven *P. parasitica* isolates were used for root inoculation, *Rpi-amr3* confer  
255 resistance against isolates 7547, 7551 and 7545, but not 3914, 7548. For isolates 0113 and 3738, we obtained  
256 some variable results for the two transgenic lines. 3-4 old weeks *N. benthamiana* were used for the root inoculation,  
257 3 plants/line were used for each experiment and three or more biological replicates were performed with similar  
258 results.

259

## 260 ***Rpi-amr3* is widely distributed in *S. americanum* and *S. nigrum***

261

262 Though susceptible accessions can be identified in detached leaf assays, most *S. americanum*  
263 and *S. nigrum* accessions show complete resistance in the field to *P. infestans*. Previously,  
264 many functional *Rpi-amr1* alleles were cloned from different *S. americanum* and *S. nigrum*  
265 accessions (Witek et al., 2021).

266

267 The identification of AVR<sub>amr3</sub> allows us to investigate the distribution of *Rpi-amr3* from all  
268 *S. americanum* and *S. nigrum* accessions. In total, 54 *S. americanum* accessions and 26 *S.*  
269 *nigrum* accessions were tested by agro-infiltration with AVR<sub>amr3</sub> for detecting functional *Rpi-*  
270 *amr3*. We found 43/54 tested *S. americanum* accessions show HR after AVR<sub>amr3</sub> agro-  
271 infiltration (Fig 6a). Similarly, 21/26 tested *S. nigrum* accessions recognize AVR<sub>amr3</sub> (Fig 6b).

272

273 To further investigate the sequence polymorphism of *Rpi-amr3* from different accessions, the  
274 *Rpi-amr3* homologs from 14 accessions were extracted from PacBio RenSeq dataset (Witek et  
275 al., 2021), including eleven accessions (SP1123, SP2272, SP2273, SP2307, SP2360, SP3399,  
276 SP3400, SP1101, SP3406 and SP3409) which respond to AVR<sub>amr3</sub> and three accessions  
277 (SP1032, SP2271 and SP2275) that do not respond to AVR<sub>amr3</sub>.

278

279 To test the functionality of *Rpi-amr3* from *S. americanum* and *S. nigrum*, *Rpi-amr3* homologs  
280 were PCR amplified from gDNA of three *S. americanum* accessions SP2272, SP2273 and  
281 SP3406, and from gDNA of two *S. nigrum* accessions SP1088 and SP1084. *Rpi-amr3* alleles  
282 (*Rpi-nig3* hereafter) were amplified from each of these two *S. nigrum* accessions and cloned  
283 into an expression vector with 35S promoter. We found all the seven *Rpi-amr3/Rpi-nig3* genes  
284 can recognize AVR<sub>amr3</sub> in transient assays (Fig 6d), but not the negative control AVR<sub>amr1</sub>.  
285 Compared to *Rpi-amr3* from SP1102, the amino-acid identity ranges from 82.2% to 95.7%  
286 (Fig 6c). Premature stop codons were found in *Rpi-amr3* homologs from SP2271 and SP2275  
287 (Figure S10), which result in loss of *Rpi-amr3* function.

288 Taken together, these data suggest *Rpi-amr3* gene is widely distributed in diploid *S.*  
 289 *americanum* and hexaploid *S. nigrum*, and contributes to their resistance to *P. infestans* and  
 290 perhaps other *Phytophthora* pathogens.  
 291

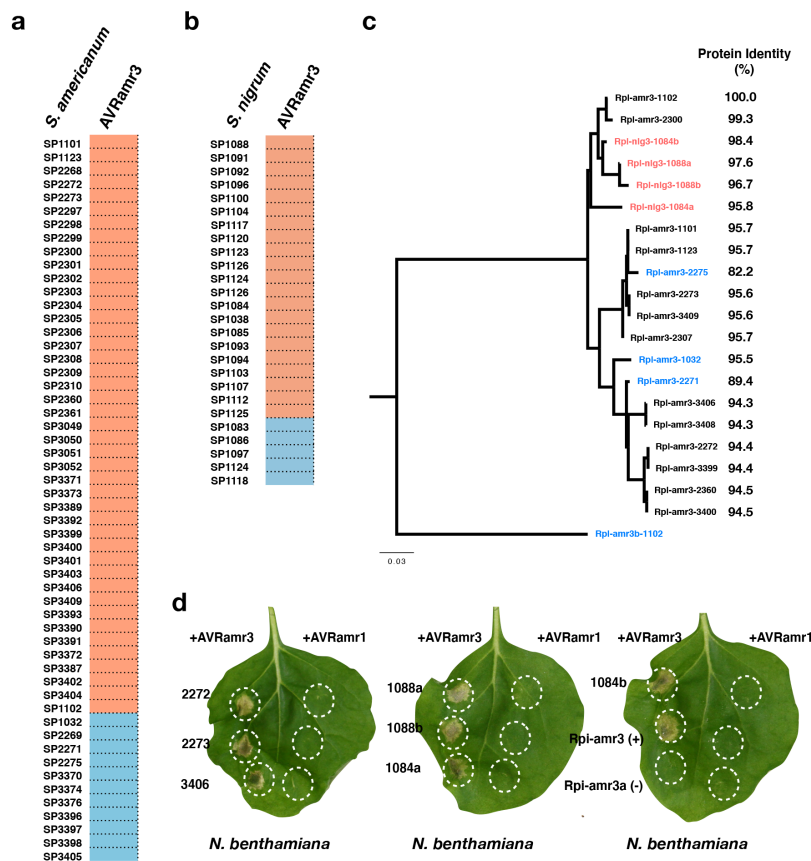

292  
 293 **Figure 6. Screen for AVRamr3 recognition on *S. americanum* and *S. nigrum* accessions.**

294 (a). 54 *S. americanum* accessions were screened with *Agrobacterium* strain GV3101(pMP90) carrying  
 295 35S::AVRamr3. The accessions with cell death upon agro-infiltration are marked by red, otherwise blue. (b). 26  
 296 *S. nigrum* accessions were screened with *Agrobacterium* strain GV3101(pMP90) carrying 35S::AVRamr3. The  
 297 accessions with cell death upon agro-infiltration are marked by red, otherwise blue. (c). Maximum likelihood (ML)  
 298 tree of Rpi-amr3 and Rpi-nig3 proteins was made by iqtree with GTT+G4 model. The *Rpi-amr3* homologs from  
 299 *S. americanum* were extracted from PacBio RenSeq assemblies (Witek et al., 2021). The four *Rpi-nig3* genes  
 300 were PCR amplified from *S. nigrum* accession SP1088 and SP1084 (red). The non-functional *Rpi-amr3* homologs  
 301 were marked by blue. Rpi-amr3b from SP1102 is a paralogue of Rpi-amr3, which was used as an outgroup of the  
 302 phylogenetic analysis. The scale bar indicates the number of amino acid substitutions per site. The protein  
 303 identities of each homolog compared to Rpi-amr3 (Rpi-amr3-1102) are shown by %. (d). Selected Rpi-amr3  
 304 homologs were cloned from three *S. americanum* accessions SP2272, SP2273, SP3406. Four Rpi-nig3 homologs  
 305 were cloned from *S. nigrum* accessions SP1088 and SP1084, and co-expressed with AVRamr3 or AVRamr1  
 306 (negative control). All of them can recognize AVRamr3 in the transient assay but not AVRamr1.

307

## 308 Discussion

309

310 In this study, by screening an RXLR effector library of *Phytophthora infestans*, we identified  
311 and characterized a novel effector AVRamr3 (PITG\_21190) that is recognized by the NLR  
312 protein Rpi-amr3 of *S. americanum*. AVRamr3 is very conserved among all tested *P. infestans*  
313 isolates, and AVRamr3 homologs were identified in twelve additional *Phytophthora* and  
314 *Hyaloperonospora arabidopsidis* genomes. These homologs are located in a syntenic region  
315 (Fig. 3a). Surprisingly, we found 9/13 tested AVRamr3 homologs can be recognized by Rpi-  
316 amr3 leading to HR in *N. benthamiana*. This finding suggests AVRamr3 is an essential effector  
317 among *Phytophthora* species, though its virulence function has yet to be determined.

318

319 According to the “zigzagzig” model of plant immunity (Jones and Dangl, 2006), the surface  
320 immune receptors like receptor-like proteins (RLPs) and receptor-like kinases (RLKs) perceive  
321 relatively conserved microbe-associated molecular patterns (MAMPs) and induce pattern-  
322 triggered immunity (PTI). Intracellular nucleotide-binding and leucine-rich repeat immune  
323 receptors (NLRs) recognize fast-evolving and lineage-specific effectors and activate effector-  
324 triggered immunity (ETI). Therefore, PTI was believed to confer broader-spectrum resistance  
325 compared to ETI. Indeed, many RLPs/RLKs recognize conserved ligands and /or confer broad-  
326 spectrum resistance, such as FLS2, EFR, RLP23, RXEG1 and ELR (Zipfel et al., 2006; Albert  
327 et al., 2015; Du et al., 2015; Wang et al., 2018). Remarkably, EFR from *Arabidopsis thaliana*  
328 enhances resistance against a range of bacterial pathogens in different crop plants, like tomato,  
329 orange and apple (Lacombe et al., 2010; Mitre et al., 2021; Piazza et al., 2021). However,  
330 apoplastic effectors can also be fast-evolving proteins, like the SCR74 family in *P. infestans*  
331 (Liu et al., 2005; Lin et al., 2020b), or *Cladosporium fulvum* AVR2, AVR4 and AVR9 (Joosten  
332 et al., 1994; Van den Ackerveken et al., 1994; Luderer et al., 2002; Westerink et al., 2004). On  
333 the other hand, MAMP-like cytoplasmic effectors/effector epitopes have been reported. For  
334 example, Sw-5b from tomato confers broad-spectrum tospovirus resistance by recognizing a  
335 conserved, 21-amino acid epitope NSm<sup>21</sup> which derives from the viral movement protein NSm  
336 (Zhu et al., 2017). A recent functional pan-genome study revealed the ETI landscape of *A.*  
337 *thaliana* and *Pseudomonas syringae*; some *P. syringae* effectors are widely conserved.  
338 Similarly, the ETI mediated by two conserved NLRs CAR1 and ZAR1 confers resistance to  
339 94.7% *P. syringae* strains (Laflamme et al., 2020). These observations, as well as our finding  
340 on AVRamr3 and Rpi-amr3, all support the view that pathogen molecules recognized by NLRs

341 can also be relatively invariant and conserved, and might contribute to broad-spectrum  
342 pathogen resistance.

343

344 To test this hypothesis, we established a *N. benthamiana* root inoculation system by using  
345 stable *Rpi-amr3* transgenic plants, and tested *P. parasitica* and *P. palmivora* which have a  
346 broad host range, and cause dramatic yield losses of many crops from different families (Meng  
347 et al., 2014; Ali et al., 2017). Importantly, we found *Rpi-amr3* does confer resistance against  
348 some *P. parasitica* and *P. palmivora* isolates. This is the first report of cloned *R* genes against  
349 *P. parasitica* and *P. palmivora* (Kourelis et al., 2021). Additionally, it is noteworthy that, in  
350 nature, many *Phytophthora* pathogens can co-inoculate the host and interspecific hybridization  
351 might occur; for example, *P. andina* was proposed to have emerged through hybridization of  
352 *P. infestans* and an unknown *Phytophthora* species (Goss et al., 2011). Natural hybrids of *P.*  
353 *parasitica* and *P. cactorum* were also found on infected loquat trees (Hurtado-Gonzales et al.,  
354 2017). An *R* protein that provides protection against both foliar and root *Phytophthora*  
355 pathogens of different species would be extremely valuable. However, some *Rpi-amr3*  
356 breaking *P. parasitica* and *P. palmivora* strains were also identified in our study, although most  
357 of them carry the recognized AVR<sub>amr3</sub> homologs. This might be caused by silencing of the  
358 recognized effector gene like *Avrvnt1* to avoid the recognition by Rpi-vnt1, or presence of other  
359 suppressors or regulators like *Avrcap1b* or splicing regulatory (SRE) effectors (Pais et al., 2018;  
360 Huang et al., 2020; Derevnina et al., 2021).

361

362 In this study, we also reported that *Rpi-amr3* directly interacts with AVR<sub>amr3</sub> and other  
363 recognized AVR<sub>amr3</sub> homologs from different *Phytophthora* species. Surprisingly, the direct  
364 interaction has not led to accelerated evolution of AVR<sub>amr3</sub> to evade detection, as we also  
365 observed for *Rpi-amr1* and AVR<sub>amr1</sub> (Lin et al., 2020a; Witek et al., 2021). This could  
366 predispose *Rpi-amr3* to function in different plant species.

367

368 Thus, *Rpi-amr3* could be deployed in Solanaceae crops like potato, tomato and tobacco against  
369 multiple *Phytophthora* diseases. However, interfamily transfer of *NLR* genes remains a  
370 challenge if *NLR* genes show “restricted taxonomic functionality” (Tai et al., 1999). The paired  
371 *NLR* genes *RPS4/RRS1* from Brassicaceae (*Arabidopsis*) can nevertheless function in other  
372 plant families like Solanaceae (tomato) and Cucurbitaceae (cucumber) against different  
373 bacterial and fungal diseases (Narusaka et al., 2013). Here, we found any of the NRC2, NRC3  
374 or NRC4 proteins are required for *Rpi-amr3* to execute its function. Thus, in the plant families



375 which lacking NRC homologs, such as tropical tree crops susceptible to *P. palmivora* and *P.*  
376 *megakarya*, co-delivery of *Rpi-amr3* and *NRC* genes might be required to defeat these  
377 *Phytophthora* diseases.

378

379 “Non-host” resistance is durable. *S. americanum* and *S. nigrum* are thought to be non-host  
380 plants of *P. infestans*, although susceptible accessions of both species have been found using  
381 DLAs. This opens the opportunity to dissect their “non-host” resistance. By using AVRamr3  
382 as a probe, we found Rpi-amr3 is widely distributed in *S. americanum* and *S. nigrum* species  
383 (Witek et al., 2021) (Fig. 6). We noticed that PITG\_21190 (AVRamr3) triggers HR in many *S.*  
384 *nigrum* accessions in a large-scale effector screening study (Dong, 2016), consistent with our  
385 findings (Fig. 6). Furthermore, we cloned four *Rpi-nig3* genes from two *S. nigrum* accessions.  
386 All the four Rpi-nig3 homologs recognize AVRamr3 in our co-expression assays (Fig. 6),  
387 although their resistance to late blight needs to be evaluated individually. The wide distribution  
388 of *Rpi-amr3* and *Rpi-amr1* suggests that these two *R* genes, perhaps with other *R* genes and the  
389 NRC network in *S. americanum* and *S. nigrum*, underpin their “non-host” resistance against  
390 potato late blight. The identification of AVRamr3 and AVRamr1 can also help to explore other  
391 novel resistance genes from *S. americanum* and *S. nigrum*.

392

393 In summary, this study reveals that *Rpi-amr3* is a conserved and broad-spectrum *R* gene from  
394 *S. americanum* and its relatives. The recognition of the conserved AVRamr3 effectors leads to  
395 resistance against several different *Phytophthora* pathogens. This finding shows great potential  
396 for resistance breeding in many crop plants against different *Phytophthora* diseases.

397

398

399

400

401

402

403

404

405

## 406 References

407

408 **Adachi H, Contreras MP, Harant A, Wu C-H, Derevnina L, Sakai T, Duggan C, Moratto**  
409 **E, Bozkur TO, Maqbool A, et al** (2019) An N-terminal motif in NLR immune receptors  
410 is functionally conserved across distantly related plant species. *eLife* **8**: 121

411 **Albert I, Böhm H, Albert M, Feiler CE, Imkampe J, Wallmeroth N, Brancato C,**  
412 **Raaymakers TM, Oome S, Zhang H, et al** (2015) An RLP23–SOBIR1–BAK1 complex  
413 mediates NLP-triggered immunity. *NPLANTS* **1**: 15140

414 **Ali SS, Shao J, Lary DJ, Strem MD, Meinhardt LW, Bailey BA** (2017) *Phytophthora*  
415 *megakarya* and *P. palmivora*, causal agents of black pod rot, induce similar plant defense  
416 responses late during infection of susceptible Cacao pods. *Frontiers in Plant Science* **8**: 36

417 **Bao Y, Ding N, Qin Q, Wu X, Martinez N, Miller R, Zaitlin D, Li D, Yang S** (2019) Genetic  
418 mapping of the *Ph* gene conferring disease resistance to black shank in tobacco. *Mol*  
419 *Breeding* 1–10

420 **Cooke DEL, Cano LM, Raffaele S, Bain RA, Cooke LR, Etherington GJ, Deahl KL,**  
421 **Farrer RA, Gilroy EM, Goss EM, et al** (2012) Genome analyses of an aggressive and  
422 invasive lineage of the Irish potato famine pathogen. *PLoS Pathog* **8**: e1002940

423 **Derevnina L, Contreras MP, Adachi H, Upson J, Cruces AV, Xie R, Sklenar J, Menke**  
424 **FLH, Mugford ST, Maclean D, et al** (2021) Plant pathogens convergently evolved to  
425 counteract redundant nodes of an NLR immune receptor network. *Biorxivorg*:  
426 2021.02.03.429184

427 **Dong R** (2016) Identification of the function of four genes encoding the RxLR secreted protein  
428 in *Phytophthora infestans*. PhD thesis. Shandong Agricultural University

429 **Du J, Verzaux E, Chaparro-Garcia A, Bijsterbosch G, Keizer LCP, Zhou J, Liebrand**  
430 **TWH, Xie C, Govers F, Robatzek S, et al** (2015) Elicitin recognition confers enhanced  
431 resistance to *Phytophthora infestans* in potato. *NPLANTS* 10.1038–nplants.2015.34

432 **Gallup CA, Shew HD** (2010) Occurrence of race 3 of *Phytophthora nicotianae* in North  
433 Carolina, the causal agent of black shank of tobacco. *Plant Disease* **94**: 557–562

434 **Gilroy EM, Breen S, Whisson SC, Squires J, Hein I, Kaczmarek M, Turnbull D, Boevink**  
435 **PC, Lokossou A, Cano LM, et al** (2011) Presence/absence, differential expression and  
436 sequence polymorphisms between *PiAVR2* and *PiAVR2*-like in *Phytophthora infestans*  
437 determine virulence on *R2* plants. *New Phytol* **191**: 763–776

438 **Goss EM, Cardenas ME, Myers K, Forbes GA, Fry WE, Restrepo S, Grünwald NJ** (2011)  
439 The plant pathogen *Phytophthora andina* emerged via hybridization of an unknown  
440 *Phytophthora* species and the Irish potato famine pathogen, *P. infestans*. *PLoS ONE* **6**:  
441 e24543

442 **Huang J, Lu X, Wu H, Xie Y, Peng Q, Gu L, Wu J, Wang Y, Reddy ASN, Dong S** (2020)  
443 *Phytophthora* effectors modulate genome-wide alternative splicing of host mRNAs to  
444 reprogram plant immunity. *Molecular Plant* **13**: 1470–1484

- 445 **Hurtado-Gonzales OP, Aragon-Caballero LM, Flores-Torres JG, Veld WMIT, Lamour**  
446 **KH** (2017) Molecular comparison of natural hybrids of *Phytophthora nicotianae* and *P.*  
447 *cactorum* infecting loquat trees in Peru and Taiwan. *Mycologia* **101**: 496–502
- 448 **Jiang RHY, Tripathy S, Govers F, Tyler BM** (2008) RXLR effector reservoir in two  
449 *Phytophthora* species is dominated by a single rapidly evolving superfamily with more  
450 than 700 members. *Proceedings of the National Academy of Sciences* **105**: 4874–4879
- 451 **Jones JDG, Dangl JL** (2006) The plant immune system. *Nature* **444**: 323–329
- 452 **Joosten MHAJ, Cozijnsen TJ, de Wit PJGM** (1994) Host resistance to a fungal tomato  
453 pathogen lost by a single base-pair change in an avirulence gene. *Nature* **367**: 384
- 454 **Kamoun S, Furzer O, Jones JDG, Judelson HS, Ali GS, Dalio RJD, Roy SG, Schena L,**  
455 **Zambounis A, Panabières F, et al** (2015) The Top 10 oomycete pathogens in molecular  
456 plant pathology. *Molecular Plant Pathology* **16**: 413–434
- 457 **Kourelis J, Sakai T, Adachi H, Kamoun S** (2021) RefPlantNLR: a comprehensive collection  
458 of experimentally validated plant NLRs. *Biorxivorg*: 2020.07.08.193961
- 459 **Lacombe S, Rougon-Cardoso A, Sherwood E, Peeters N, Dahlbeck D, van Esse HP,**  
460 **Smoker M, Rallapalli G, Thomma BPHJ, Staskawicz B, et al** (2010) Interfamily  
461 transfer of a plant pattern-recognition receptor confers broad-spectrum bacterial resistance.  
462 *Nature Biotechnology* **28**: 365
- 463 **Laflamme B, Dillon MM, Martel A, Almeida RND, Desveaux D, Guttman DS** (2020) The  
464 pan-genome effector-triggered immunity landscape of a host-pathogen interaction. *Science*  
465 **367**: 763–768
- 466 **Lin X, Song T, Fairhead S, Witek K, Jouet A, Jupe F, Witek AI, Karki HS, Vleeshouwers**  
467 **VGAA, Hein I, et al** (2020a) Identification of Avramr1 from *Phytophthora infestans* using  
468 long read and cDNA pathogen-enrichment sequencing (PenSeq). *Molecular Plant*  
469 *Pathology* **18**: 547–11
- 470 **Lin X, Wang S, de Rond L, Bertolin N, Wouters RHM, Wouters D, Domazakis E, Bitew**  
471 **MK, Win J, Dong S, et al** (2020b) Divergent evolution of PcF/SCR74 effectors in  
472 oomycetes is associated with distinct recognition patterns in Solanaceous plants. *MBio* **11**:  
473 380
- 474 **Liu Z, Bos JIB, Armstrong M, Whisson SC, da Cunha L, Torto-Alalibo T, Win J, Avrova**  
475 **AO, Wright F, Birch PRJ, et al** (2005) Patterns of diversifying selection in the  
476 phytotoxin-like *scr74* gene family of *Phytophthora infestans*. *Mol Biol Evol* **22**: 659–672
- 477 **Luderer R, Takken FLW, de Wit PJGM, Joosten MHAJ** (2002) *Cladosporium fulvum*  
478 overcomes *Cf-2*-mediated resistance by producing truncated AVR2 elicitor proteins.  
479 *Molecular Microbiology* **45**: 875–884
- 480 **Meng Y, Zhang Q, Ding W, Shan W** (2014) *Phytophthora parasitica*: a model oomycete  
481 plant pathogen. *Mycology* **5**: 43–51
- 482 **Mitre LK, Teixeira-Silva NS, Rybak K, Magalhães DM, de Souza-Neto RR, Robatzek S,**  
483 **Zipfel C, de Souza AA** (2021) The *Arabidopsis* immune receptor EFR increases resistance

- 484 to the bacterial pathogens *Xanthomonas* and *Xylella* in transgenic sweet orange. Plant  
485 Biotechnology J. doi: 10.1111/pbi.13629
- 486 **Narusaka M, Kubo Y, Hatakeyama K, Imamura J, Ezura H, Nanasato Y, Tabei Y,**  
487 **Takano Y, Shirasu K, Narusaka Y** (2013) Interfamily transfer of dual *NB-LRR* genes  
488 confers resistance to multiple pathogens. PLoS ONE 8: e55954
- 489 **Oliva RF, Cano LM, Raffaele S, Win J, Bozkur TO, Belhaj K, Oh S-K, THINES M,**  
490 **Kamoun S** (2015) A recent expansion of the RXLR effector gene *Avrblb2* is maintained  
491 in global populations of *Phytophthora infestans* indicating different contributions to  
492 virulence. MPMI 28: 901–912
- 493 **Pais M, Yoshida K, Giannakopoulou A, Pel MA, Cano LM, Oliva RF, Witek K,**  
494 **Lindqvist-Kreuze H, Vleeshouwers VGAA, Kamoun S** (2018) Gene expression  
495 polymorphism underpins evasion of host immunity in an asexual lineage of the Irish potato  
496 famine pathogen. BMC Evol Biol 18: 1–11
- 497 **Piazza S, Campa M, Pompili V, Costa LD, Salvagnin U, Nekrasov V, Zipfel C, Malnoy M**  
498 (2021) The *Arabidopsis* pattern recognition receptor EFR enhances fire blight resistance  
499 in apple. Biorxivorg: 2021.01.22.427734
- 500 **Rahman MZ, Uematsu S, Takeuchi T, Shirai K, Ishiguro Y, Suga H, Kageyama K** (2014)  
501 Two new species, *Phytophthora nagaii* sp. nov. and *P. fragariaefolia* sp. nov., causing  
502 serious diseases on rose and strawberry plants, respectively, in Japan. J Gen Plant Pathol  
503 80: 348–365
- 504 **Rehmany AP, Gordon A, Rose LE, Allen RL, Armstrong MR, Whisson SC, Kamoun S,**  
505 **Tyler BM, Birch PRJ, Beynon JL** (2005) Differential recognition of highly divergent  
506 downy mildew avirulence gene alleles by *RPP1* resistance genes from two *Arabidopsis*  
507 lines. The Plant Cell 17: 1839–1850
- 508 **Sahoo DK, Abeysekara NS, Cianzio SR, Robertson AE, Bhattacharyya MK** (2017) A  
509 novel *Phytophthora sojae* resistance *Rps12* gene mapped to a genomic region that contains  
510 several *Rps* genes. PLoS ONE 12: e0169950
- 511 **Segretin ME, Pais M, Franceschetti M, Chaparro-Garcia A, Bos JIB, Banfield MJ,**  
512 **Kamoun S** (2014) Single amino acid mutations in the potato immune receptor R3a expand  
513 response to *Phytophthora* effectors. MPMI 27: 624–637
- 514 **Shan W, Cao M, Leung D, Tyler BM** (2004) The *Avr1b* locus of *Phytophthora sojae* encodes  
515 an elicitor and a regulator required for avirulence on soybean plants carrying resistance  
516 gene *Rps1b*. MPMI 17: 394–403
- 517 **Tai TH, Dahlbeck D, Clark ET, Gajiwala P, Pasion R, Whalen MC, Stall RE, Staskawicz**  
518 **BJ** (1999) Expression of the *Bs2* pepper gene confers resistance to bacterial spot disease  
519 in tomato. Proceedings of the National Academy of Sciences 96: 14153–14158
- 520 **Thevenin J-M, Rossi V, Ducamp M, Doare F, Condina V, Lachenaud P** (2012) Numerous  
521 clones resistant to *Phytophthora palmivora* in the “Guiana” genetic group of *Theobroma*  
522 *cacao* L. PLoS ONE 7: e40915

- 523 **Van den Ackerveken GFJM, Dunn RM, Cozijnsen AJ, Vossen JPMJ, Van den Broek**  
524 **HWJ, de Wit PJGM** (1994) Nitrogen limitation induces expression of the avirulence gene  
525 *avr9* in the tomato pathogen *Cladosporium fulvum*. *Mol Gen Genet* **243**: 277–285
- 526 **Vega-Arreguín JC, Jalloh A, Bos JI, Moffett P** (2014) Recognition of an Avr3a homologue  
527 plays a major role in mediating nonhost resistance to *Phytophthora capsici* in *Nicotiana*  
528 species. *MPMI* **27**: 770–780
- 529 **Vleeshouwers VGAA, Raffaele S, Vossen JH, Champouret N, Oliva R, Segretin ME,**  
530 **Rietman H, Cano LM, Lokossou A, Kessel G, et al** (2011) Understanding and exploiting  
531 late blight resistance in the age of effectors. *Annu Rev Phytopathol* **49**: 507–531
- 532 **Wang S, McLellan H, Bukharova T, He Q, Murphy F, Shi J, Sun S, van Weymers P, Ren**  
533 **Y, Thilliez G, et al** (2019) *Phytophthora infestans* RXLR effectors act in concert at diverse  
534 subcellular locations to enhance host colonization. *Journal of Experimental Botany* **70**:  
535 343–356
- 536 **Wang Y, Xu Y, Sun Y, Wang H, Qi J, Wan B, Ye W, Lin Y, Shao Y, Dong S, et al** (2018)  
537 Leucine-rich repeat receptor-like gene screen reveals that *Nicotiana* RXEG1 regulates  
538 glycoside hydrolase 12 MAMP detection. *Nat Commun* **9**: 594–12
- 539 **Westerink N, Brandwagt BF, de Wit PJGM, Joosten MHAJ** (2004) *Cladosporium fulvum*  
540 circumvents the second functional resistance gene homologue at the *Cf-4* locus (*Hcr9-4E*)  
541 by secretion of a stable *avr4E* isoform. *Molecular Microbiology* **54**: 533–545
- 542 **Win J, Krasileva KV, Kamoun S, Shirasu K, Staskawicz BJ, Banfield MJ** (2012) Sequence  
543 divergent RXLR effectors share a structural fold conserved across plant pathogenic  
544 oomycete Species. *PLoS Pathog* **8**: e1002400
- 545 **Witek K, Jupe F, Witek AI, Baker D, Clark MD, Jones JDG** (2016) Accelerated cloning of  
546 a potato late blight–resistance gene using RenSeq and SMRT sequencing. *Nature*  
547 *Biotechnology* **34**: 656–660
- 548 **Witek K, Lin X, Karki HS, Jupe F, Witek AI, Steuernagel B, Stam R, van Oosterhout C,**  
549 **Fairhead S, Heal R, et al** (2021) A complex resistance locus in *Solanum americanum*  
550 recognizes a conserved *Phytophthora* effector. *NPLANTS* **7**: 198–208
- 551 **Wu C-H, Abd-El-Haliem A, Bozkur TO, Belhaj K, Terauchi R, Vossen JH, Kamoun S**  
552 (2017) NLR network mediates immunity to diverse plant pathogens. *Proceedings of the*  
553 *National Academy of Sciences* **114**: 8113–8118
- 554 **Wu C-H, Adachi H, la Concepcion De JC, Castells-Graells R, Nekrasov V, Kamoun S**  
555 (2020) *NRC4* Gene cluster Is not essential for bacterial flagellin-triggered immunity.  
556 *PLANT PHYSIOLOGY* **182**: 455–459
- 557 **Zhu M, Jiang L, Bai B, Zhao W, Chen X, Li J, Liu Y, Chen Z, Wang B, Wang C, et al**  
558 (2017) The intracellular immune receptor Sw-5b confers broad-spectrum resistance to  
559 tospoviruses through recognition of a conserved 21-amino acid viral effector epitope. *The*  
560 *Plant Cell* **29**: 2214–2232

561 **Zipfel C, Kunze G, Chinchilla D, Caniard A, Jones JDG, Boller T, Felix G (2006)**  
562 Perception of the bacterial PAMP EF-Tu by the receptor EFR restricts *Agrobacterium*-  
563 mediated transformation. *Cell* **125**: 749–760

564

## 565 **Acknowledgements**

566 This research was financed from BBSRC grant BB/P021646/1 and the Gatsby Charitable  
567 Foundation. We thank TSL transformation team (Matthew Smoker and Jodie Taylor), SynBio  
568 team (Mark Youles) and horticultural team (Sara Perkins, Justine Smith, Lesley Phillips and  
569 Catherine Taylor) for their support. We thank Experimental Garden and Genebank of Radboud  
570 University, Nijmegen, The Netherlands, IPK Gatersleben, Germany and Sandra Knapp  
571 (Natural History Museum, London, UK) for access to *S. americanum* and *S. nigrum* genetic  
572 diversity. We thank He Meng and Lirui Cheng from CAAS for kindly sharing the *Phytophthora*  
573 *parasitica* isolates R0 and R1, and Franck Panabières from INRA for kindly sharing the  
574 *Phytophthora parasitica* isolates 310, 329, 666 and 721. We thank Joe Win from TSL for  
575 maintaining the *P. palmivora* strains. We thank Paul Birch and colleagues at James Hutton  
576 Institute for making available clones of some of the effectors that were tested for AVRamr3  
577 function.

578

## 579 **Author contributions:**

580 X.L. and J.D.G.J. designed the study. X.L., A.C.O.A., R.H., K.W., H.S.K., T.S., C.-H.W. and  
581 H.A. performed the experiments. X.L., A.C.O.A., R.H. and K.W. analysed the data. X.L. and  
582 J.D.G.J. wrote the manuscript with input from all authors. S.K. and V.G.A.A.V. contributed  
583 resources. All authors approved the manuscript.

584

## 585 **Conflict of interest:**

586 K. W. and J.D.G.J. are named inventors on a patent application (PCT/US2016/031119)  
587 pertaining to *Rpi-amr3* that was filed by the 2Blades Foundation on behalf of the Sainsbury  
588 Laboratory. The other authors declare no competing interests.

589

590

591

592

593 **Supplementary files:**

594

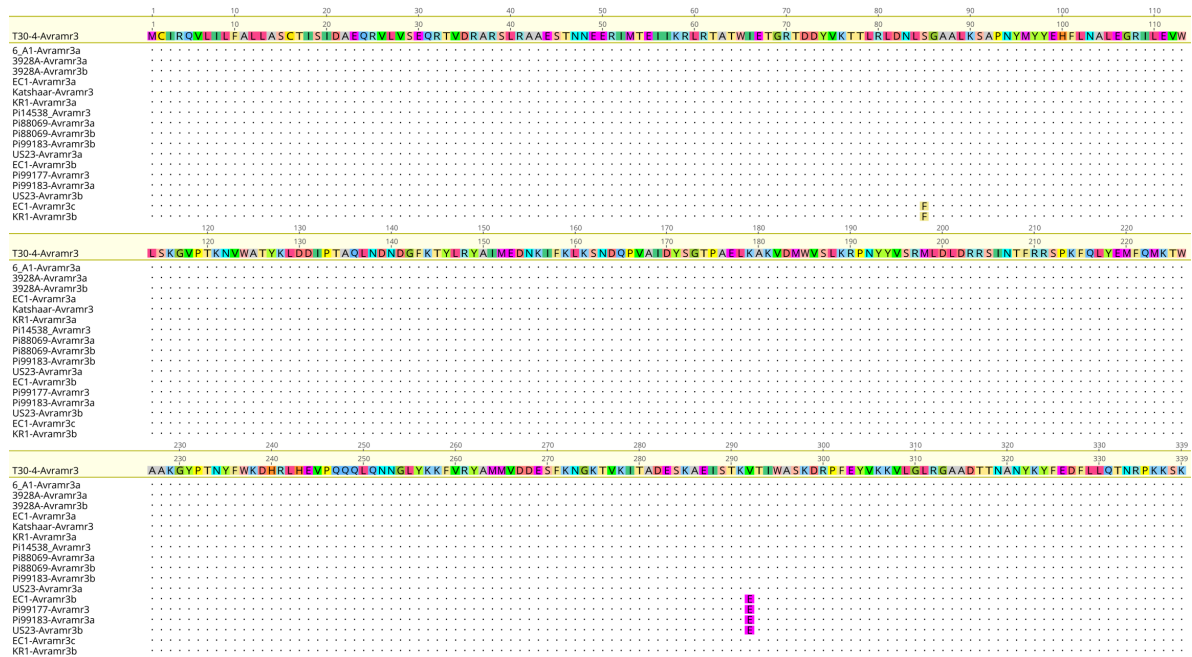

595

596 **Figure S1: Protein alignment reveals strong conservation of *P. infestans* AVRamr3 alleles and**

597 **paralogs**



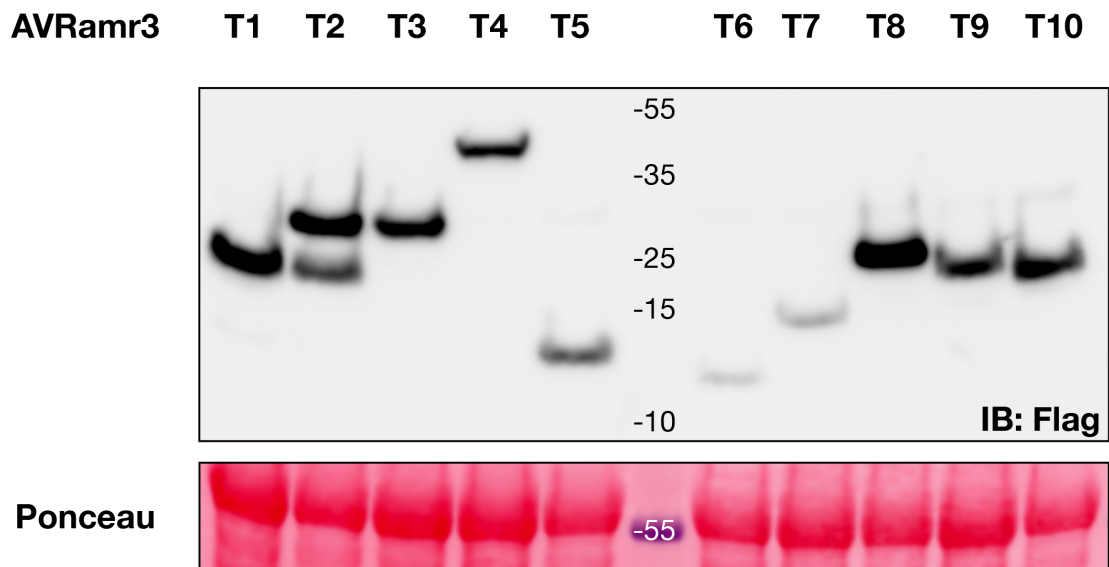

598

599 **Figure S2:** Western blot for AVRamr3 truncations with C-terminus HIS-FLAG tag.

600

601

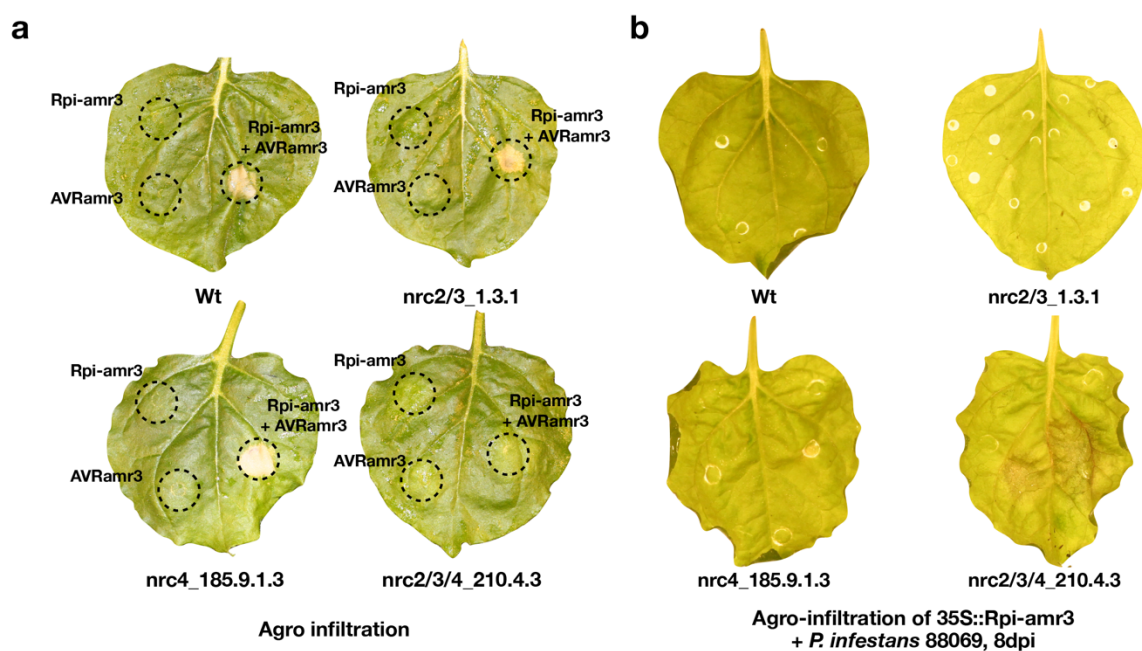

602

603 **Figure S3:** Rpi-amr3 is NRC2, NRC3 or NRC4 dependent. (a) HR phenotype after expressing  
604 Rpi-amr3, AVRamr3 and Rpi-amr3+AVRamr3 in wild type, *nrc2/3\_1.3.1*, *nrc4\_185.9.1.3* and  
605 *nrc2/3/4\_210.4.3* knockout *N. benthamiana* lines. (b) Detached leaf assay (DLA) after Rpi-  
606 *amr3* transient expression in wild type, *nrc2/3\_1.3.1*, *nrc4\_185.9.1.3* and *nrc2/3/4\_210.4.3*  
607 knockout *N. benthamiana*. 500 zoospores of *P. infestans* 88069 were used one day after Rpi-  
608 *amr3* transient expression by agro-infiltration. The photos were taken eight days after  
609 inoculation.

610

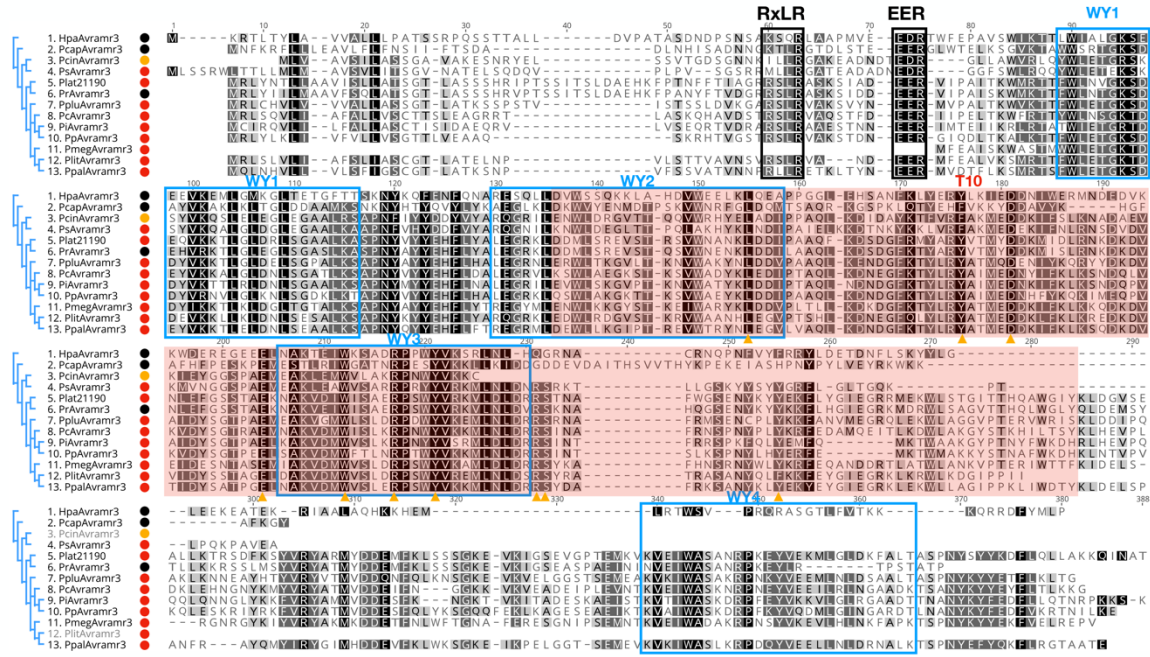

611

612 **Figure S4:** Protein alignment of AVRamr3 homologs from different *Phytophthora* genomes,  
 613 including *Phytophthora infestans* (Pi), *Phytophthora parasitica* (Pp), *Phytophthora cactorum*  
 614 (Pc), *Phytophthora palmivora* (Ppal), *Phytophthora megakarya* (Pmeg), *Phytophthora litchi*  
 615 (Plit), *Phytophthora sojae* (Ps), *Phytophthora lateralis* (Plat), *Phytophthora pluvialis* (Pplu),  
 616 *Phytophthora ramorum* (Pr), *P. cinnamomi* (Pcin), *P. capsica* (Pcap) and *Hyaloperonospora*  
 617 *arabidopsidis* (Hpa). The circles after the name are their recognition specificity by Rpi-amr3  
 618 in the HR assay, red: HR; black: no HR; yellow: weak HR. The RXLR and EER motifs are  
 619 marked by black boxes. The predicted WY motifs are marked by blue boxes. The conserved  
 620 amino acids which were selected for mutagenesis (see Figure S5) are marked by yellow arrows.

621

622

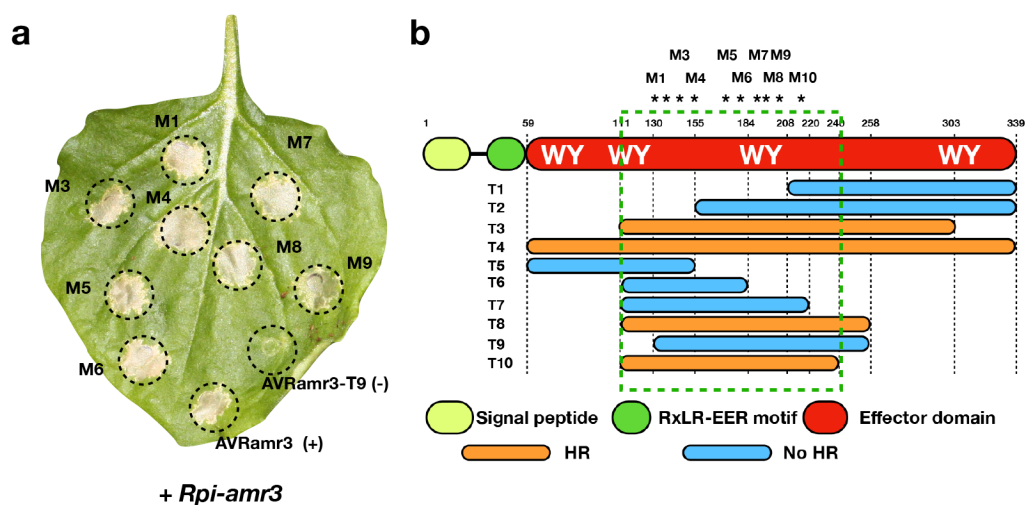

623

624 **Figure S5:** Mutagenesis of AVRamr3 from *Phytophthora infestans*. **(a)** Eight *Avramr3*  
 625 mutants were generated by PCR and cloned into over-expression vector with 35S promoter.  
 626 All of them induce HR when co-expressed with *Rpi-amr3*. An AVRamr3 truncation T9 was  
 627 used as negative control, full-length AVRamr3 was used as positive control. **(b)** The position  
 628 of each mutation is marked by asterisk, and correspond to those amino acids marked by yellow  
 629 arrows in Fig S4. All the mutants are in the T10 region and are conserved among different  
 630 AVRamr3 homologs from other *Phytophthora* species (see Figure S4).

631

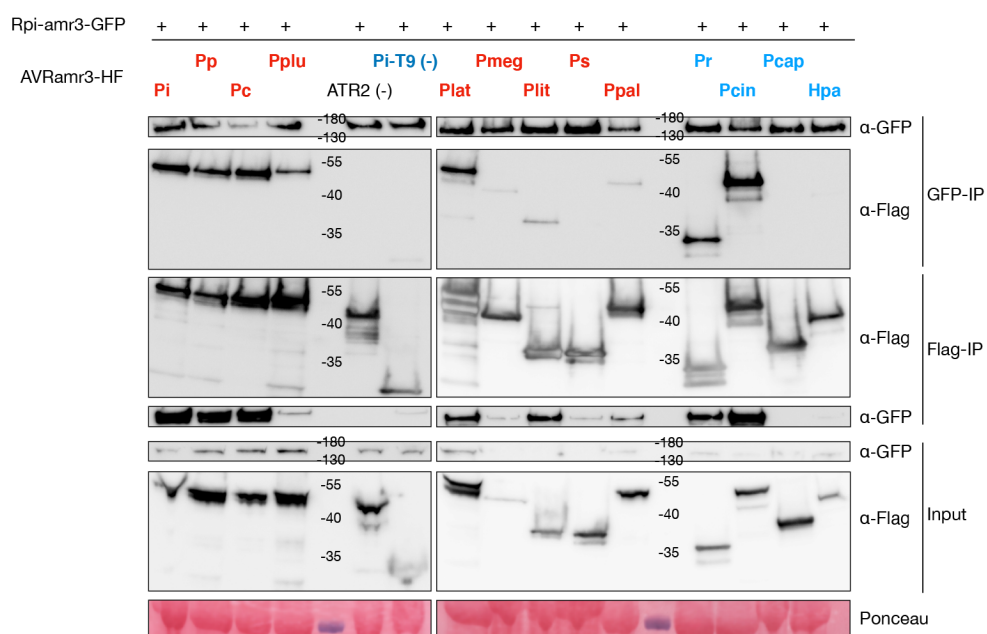

632  
633  
634  
635  
636  
637

**Figure S6:** Co-IP of Rpi-amr3 and AVRamr3 homologs. Rpi-amr3 is tagged with C-terminal GFP, and all AVRamr3 homologs are fused with a C-terminal HIS-FLAG tag. Bi-directional Co-IPs were performed by GFP-IP or Flag-IP individually then incubated with Flag-HRP or GFP-HRP antibody. ATR2 and AVRamr3 truncation T9 were used as negative controls.

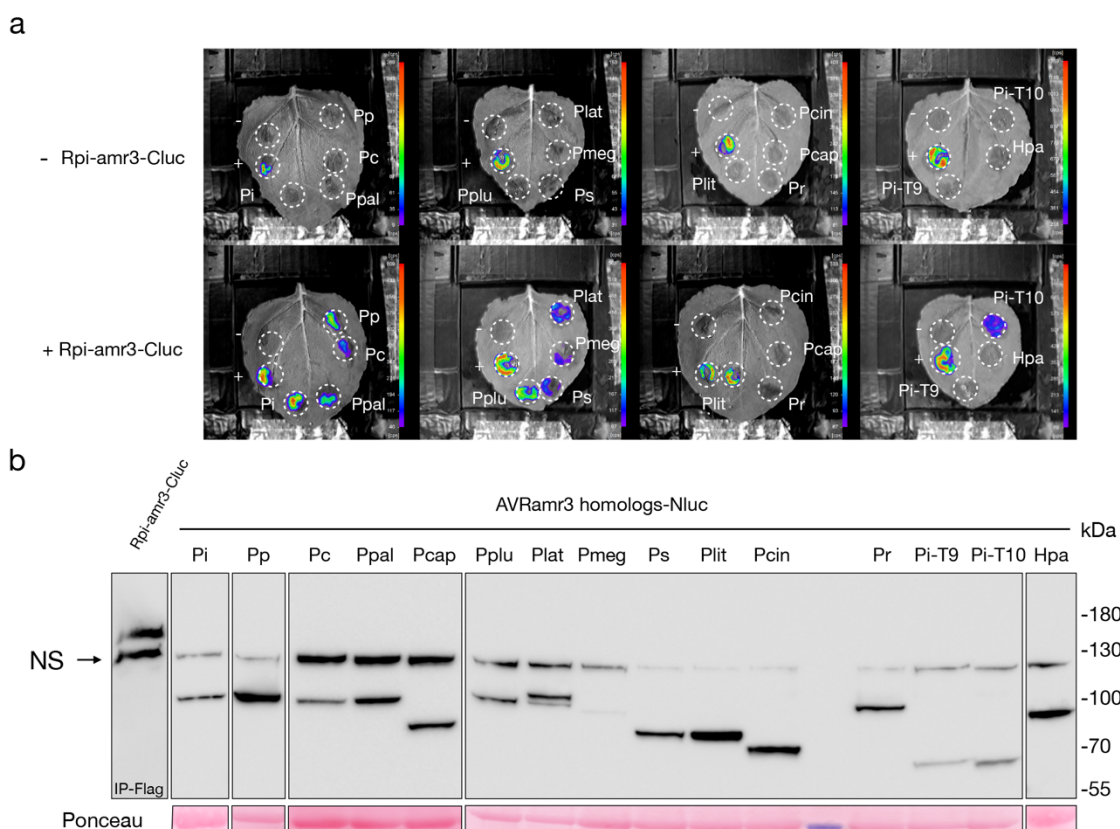

638

639 **Figure S7:** Split luciferase for Rpi-amr3 and AVRamr3 homologs from different *Phytophthora*  
 640 species. Rpi-amr3 was fused with Flag-Cluc and AVRamr3 homologs were fused with Flag-  
 641 Nluc. The experiment was performed in nrc2/3/4\_210.4.3 knockout *Nicotiana benthamiana* to  
 642 abolish HR. **(a).** Expressing the AVRamr3::Flag-Nluc homologs alone does not show  
 643 luciferase signal; Co-expression of Rpi-amr3::Flag-Cluc with AVRamr3::Flag-Nluc homologs  
 644 can induce luciferase signal, specifically, *P. infestans* (Pi), *P. parasitica* (Pp), *P. cactorum* (Pc),  
 645 *P. palmivora* (Ppal), *P. megakarya* (Pmeg), *P. litchi* (Plit), *P. sojae* (Ps), *P. lateralis* (Plat) and  
 646 *P. pluvialis* (Pplu) interact with Rpi-amr3::Flag-Cluc; AVRamr3 homologs from *P. ramorum*  
 647 (Pr), *P. cinnamomi* (Pcin), *P. capsici* (Pcap) and *Hyaloperonospora arabidopsidis* (Hpa) do  
 648 not interact with Rpi-amr3 in this assay. **(b).** Western blot by FLAG antibody was performed  
 649 to confirm the expression of all proteins.

650

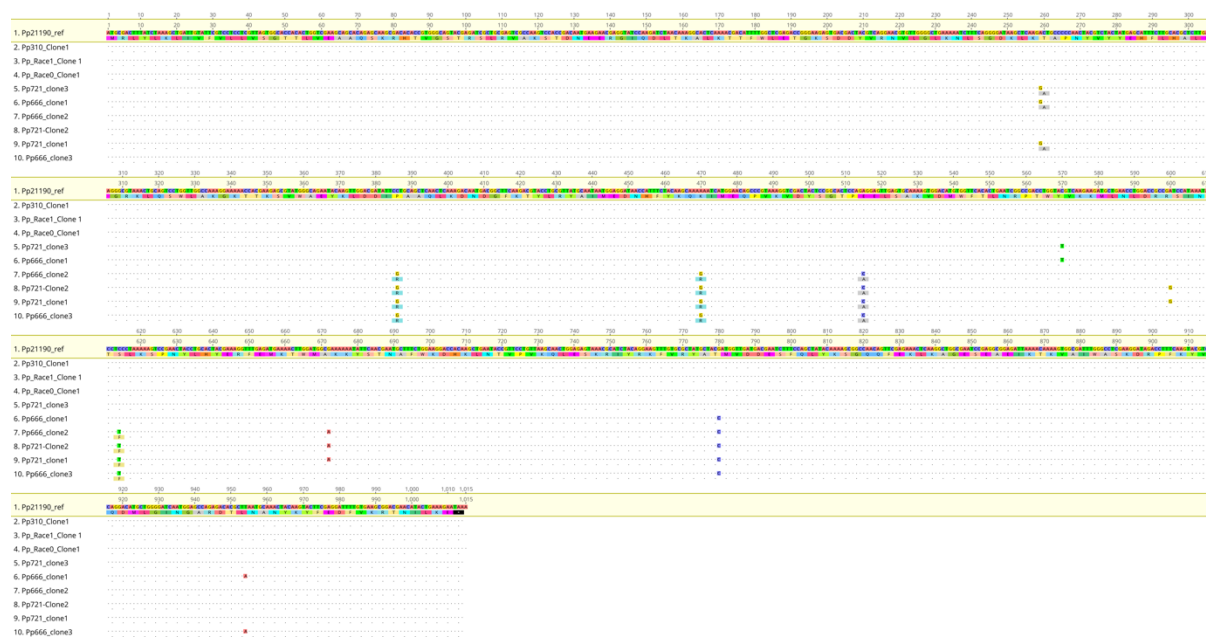

**Figure S8:** DNA alignment of *Avramr3* homologs from different *Phytophthora parasitica* isolates. The polymorphic DNA and amino acids are highlighted.

655

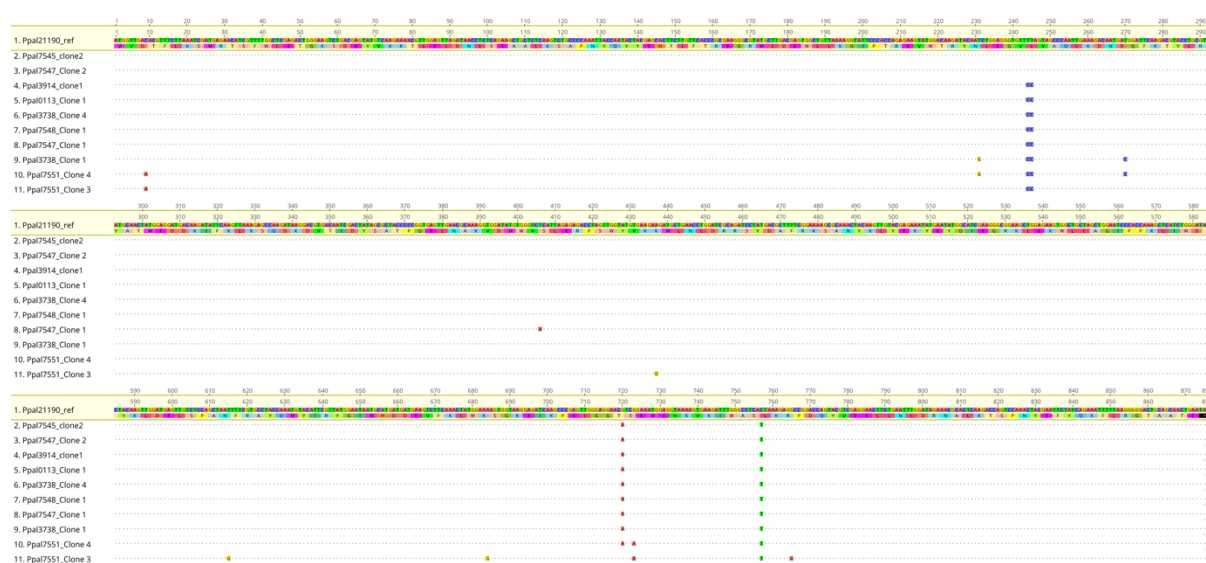

656

657 **Figure S9:** DNA alignment of *Avramr3* homologs from different *Phytophthora palmivora*  
658 isolates. The polymorphic DNA and amino acids are highlighted.

659



660

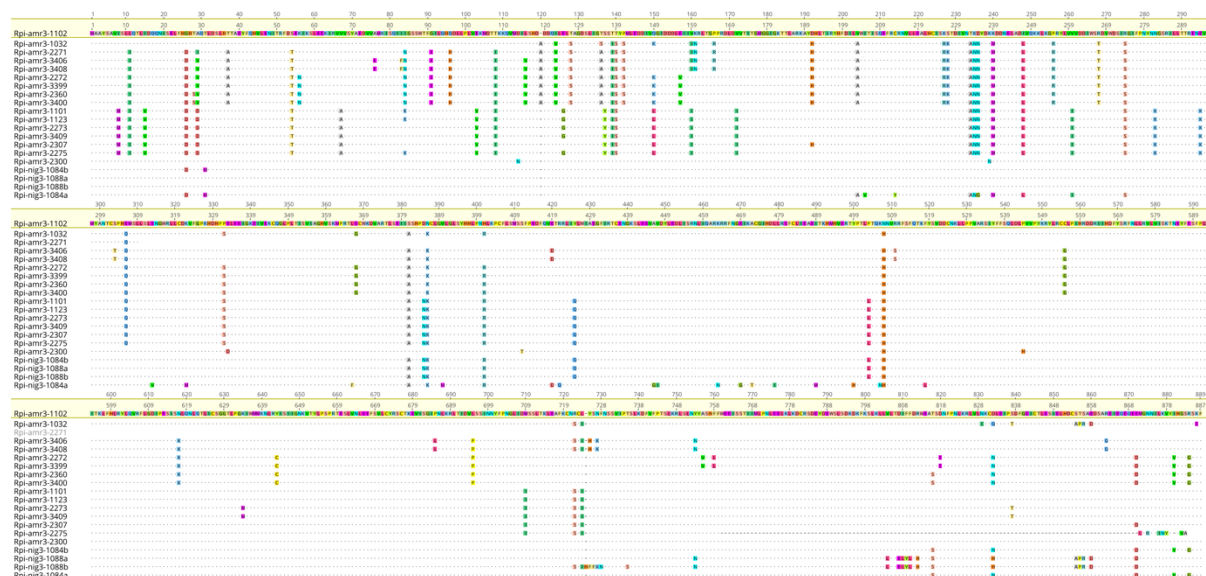

661

662 **Figure S10:** Protein alignment of Rpi-amr3 and Rpi-nig3 homologs from *Solanum*  
663 *americanum* and *Solanum nigrum* accessions. The Rpi-amr3 was used as reference, all the  
664 polymorphic amino acids are highlighted.

665

666

667

668

669
